# Supplementary material
Source: Springer Nature journal article supplement (https://www.springermedizin.de/resource/supplementary/12903_2011_204_MOESM7_ESM.pdf/9516352)
Supplement: MOESM7 [file 9516352]

**12 months**

*6-month group = S&P + OHA*

*12-month group = S&P + OHA*

*24-month group = OHA*

Received allocated intervention N=119

Did not receive allocated intervention N=0

Did not attend N=2

Patient chose to discontinue N=3

Withdrawn by family dentist N=0

Withdrawn by independent examiner N=0

Received allocated intervention N=111

Did not receive allocated intervention N=1

Did not attend N=5

Patient chose to discontinue N=2

Withdrawn by family dentist N=0

Recruited in error N=3

Received allocated intervention N=103

Did not receive allocated intervention N=2

Did not attend N=10

Patient chose to discontinue N=6

Withdrawn by family dentist N=1

**18 months**

*6-month group = S&P + OHA*

*12-month group = OHA*

*24-month group = OHA*

Received allocated intervention N=110

Did not receive allocated intervention N=0

Did not attend N=7

Patient chose to discontinue N=4

Withdrawn by family dentist N=1

Withdrawn by independent examiner N=3

Received allocated intervention N=99

Did not receive allocated intervention N=5

Did not attend N=7

Patient chose to discontinue N=4

Withdrawn by family dentist N=0

Withdrawn by independent examiner N=4

Received allocated intervention N= 99

Did not receive allocated intervention N=0

Did not attend N=11

Patient chose to discontinue N=7

Withdrawn by family dentist N=1

Withdrawn by independent examiner N=5
